# Supplementary material for: Intake of Sugar Substitute Gummy Candies Benefits the Glycemic Response in Healthy Adults: A Prospective Crossover Clinical Trial
Source: MDPI journal article supplement (doi:10.3390/gels8100642), 2022-10-10
Supplement: s1 [file s1]

**Supplementary material**

**Intake of Sugar Substitute Gummy Candies Benefits the  
Glycemic Response in Healthy Adults: A Prospective Crossover  
Clinical Trial**

**Table S1. Fabrication formulations of control and different test gummy samples**

|                        | <b>CG</b>                 |     | <b>P-SG</b>               |     | <b>T-SG</b>   |     |
|------------------------|---------------------------|-----|---------------------------|-----|---------------|-----|
| <b>Carbohydrates %</b> | Glucose syrup             | 41% | Maltitol                  | 65% | Maltitol      | 66% |
|                        | Sucrose                   | 31% | Erythritol                | 8%  | Erythritol    | 8%  |
|                        | Concentrate d apple juice | 2%  | Concentrate d apple juice | 2%  | /             | /   |
| <b>Protein%</b>        | Gelatin                   | 6%  | Gelatin                   | 6%  | Gelatin       | 6%  |
| <b>Fat%</b>            | DHA algal oil             | 4%  | DHA algal oil             | 4%  | DHA algal oil | 4%  |

**Note:** Other ingredients include gum arabic, acid-treated starch, phospholipids, flavors, pigments, and acids, and the dosage is the same for each formula.

**Table S2. Blood glucose levels (mmol/L) after consumption of a 10 g glucose bolus or three types of nutri-tional gummies providing equivalent amounts of available carbohydrates (Mean±SD)**

| Time  |               | Blood glucose (mean±SD) (mmol/L) |               |               |           | Significant difference |             |            |            |              |
|-------|---------------|----------------------------------|---------------|---------------|-----------|------------------------|-------------|------------|------------|--------------|
| (min) | Glucose       | CG                               | P-SG          | T-SG          | Glu vs CG | Glu vs P-SG            | Glu vs T-SG | CG vs P-SG | CG vs T-SG | P-SG vs T-SG |
| 0     | 5.29±0.32     | 5.24±0.03                        | 5.28±0.33     | 5.24±0.33     | ns        | ns                     | ns          | ns         | ns         | ns           |
| 15    | 7.02±0.57#### | 6.53±0.48###                     | 5.62±0.36##   | 5.59±0.32##   | *         | ***                    | ***         | ***        | ***        | ns           |
| 30    | 7.55±0.73#### | 6.98±0.75####                    | 6.04±0.58#### | 5.90±0.35#### | ns        | ***                    | ***         | ***        | ***        | ns           |
| 45    | 6.39±0.66#### | 5.96±0.58####                    | 5.92±0.61##   | 5.93±0.51#### | ns        | ns                     | ns          | ns         | ns         | ns           |
| 60    | 5.50±0.52     | 5.38±0.58                        | 5.65±0.52#    | 5.63±0.57#    | ns        | ns                     | ns          | ns         | ns         | ns           |
| 90    | 5.06±0.33#    | 5.09±0.38                        | 5.28±0.35     | 5.28±0.41     | ns        | ns                     | ns          | ns         | ns         | ns           |
| 120   | 4.99±0.33#    | 4.92±0.31##                      | 5.15±0.32     | 5.33±0.40     | ns        | ns                     | *           | ns         | **         | ns           |

Abbreviations: Glu, glucose, #, every times vs 0 min; #, P < 0.05; ##, P < 0.01; ###, P < 0.001; \*, P < 0.05; \*\*, P < 0.01; \*\*\*, P < 0.001
